# Supplementary material for: Role of Fucoidan on the Growth Behavior and Blood Metabolites and Toxic Effects of Atrazine in Nile Tilapia Oreochromis niloticus (Linnaeus, 1758)
Source: MDPI journal article supplement (doi:10.3390/ani11051448), 2021-05-18
Supplement: s1 [file s1]

**Table S1.** Basal diet and proximate chemical composition (on dry matter basis)

| Ingredient                           | (%)  | Chemical composition              | (%)   |
|--------------------------------------|------|-----------------------------------|-------|
| Fish meal (65%)                      | 10   | Crude protein                     | 30.14 |
| Soybean meal (44%)                   | 36   | Crude lipids                      | 6.98  |
| Gluten                               | 5    | Ash                               | 7.57  |
| Wheat bran                           | 12   | Crude fibers                      | 5.45  |
| Rice bran                            | 10   | Gross energy (MJ/kg) <sup>2</sup> | 18.44 |
| Yellow corn                          | 12   |                                   |       |
| Wheat flour                          | 8.92 |                                   |       |
| Fish oil                             | 3    |                                   |       |
| Vitamin and mineral mix <sup>1</sup> | 2    |                                   |       |
| Dicalcium phosphate                  | 1    |                                   |       |
| Vitamin C                            | 0.08 |                                   |       |

<sup>1</sup>Vitamin and mineral mixture (per kg premix): vitamin A (3300 IU), vitamin D<sub>3</sub> (410 IU), vitamin B<sub>1</sub> (133 mg), vitamin B<sub>2</sub> (580 mg), vitamin B<sub>6</sub> (410 mg), vitamin B<sub>12</sub> (50 mg), biotin (9330 mg), colin chloride (4000 mg), vitamin C (2660 mg), inositol (330 mg), para-amino benzoic acid (9330 mg), niacin (26.60 mg), pantothenic acid (2000 mg), manganese (325 mg), iron (200 mg), copper (25 mg), iodine, cobalt (5 mg).

<sup>2</sup>Gross energy was calculated based on the values of values for protein, lipid, and carbohydrate as 23.6, 39.5 and 17.2 KJ/g, respectively.
